# Supplementary figures and images for: Preparation and magneto-optical properties of stable bismuth phosphate nanoparticles in phosphate glass
Source: Royal Society of Chemistry journal article supplement (doi:10.1039/c5ra05483d), 2015-01-01

### S1 FT-IR spectrum of BiPO<sub>4</sub> glass nanocomposite

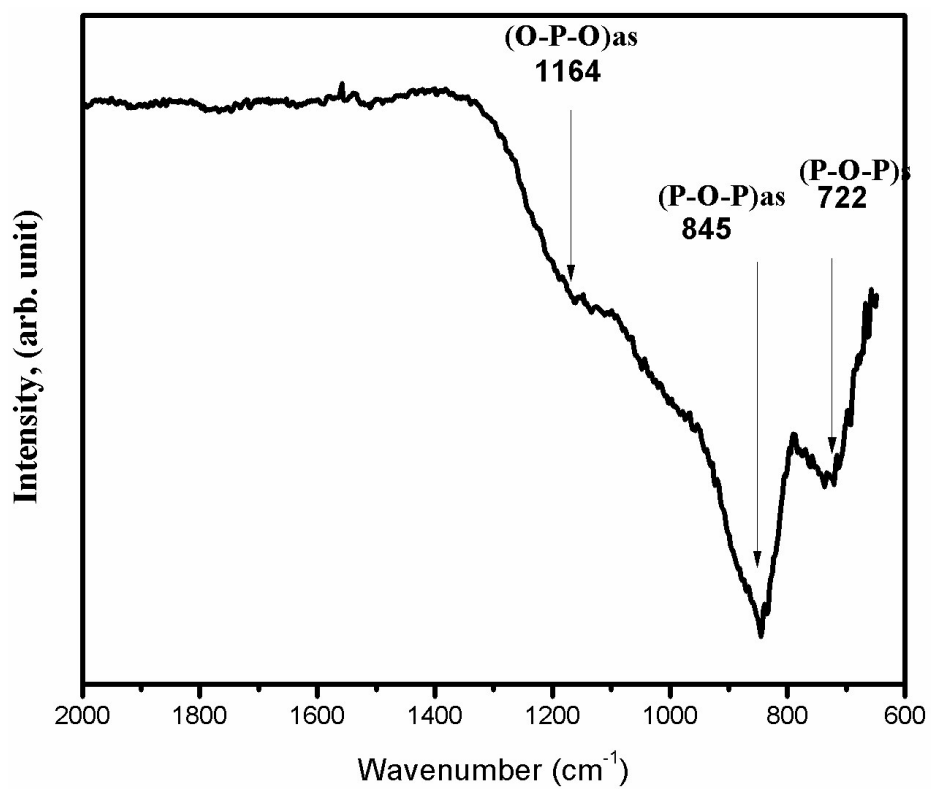

Supplement: c5ra05483d1.pdf [file c5ra05483d1.pdf]
